# Supplementary material
Source: Springer Nature journal article supplement (https://www.springermedizin.de/resource/supplementary/13054_2011_550_MOESM5_ESM.pdf/9708788)

A)

# Arterial Lactate as a Function of BMI

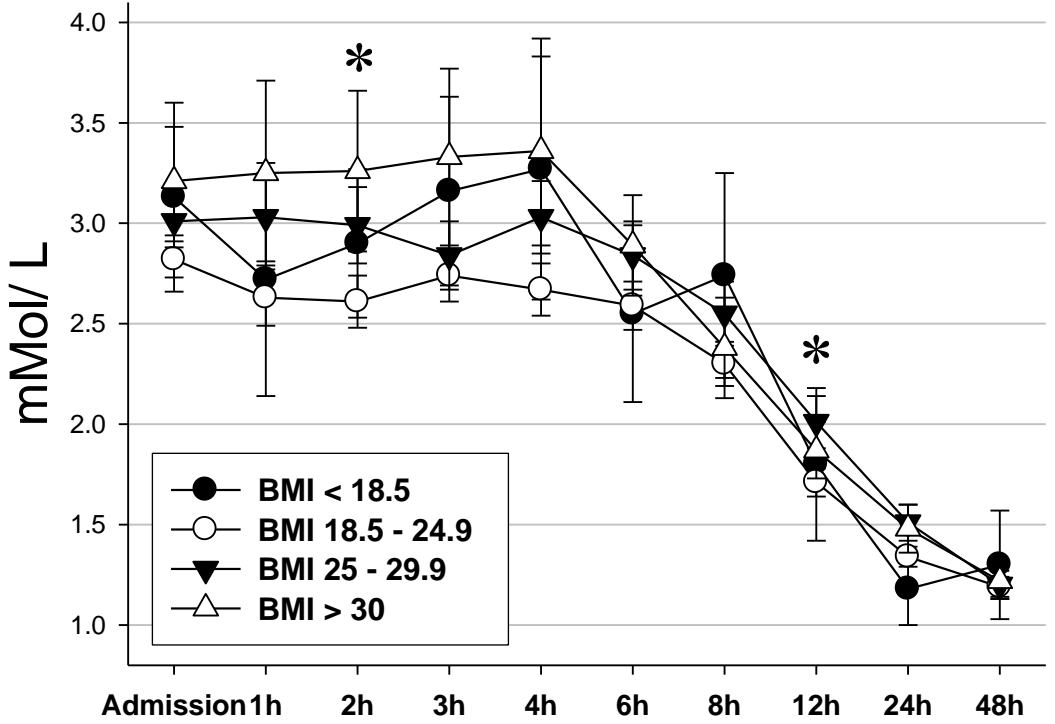

B)

# pH

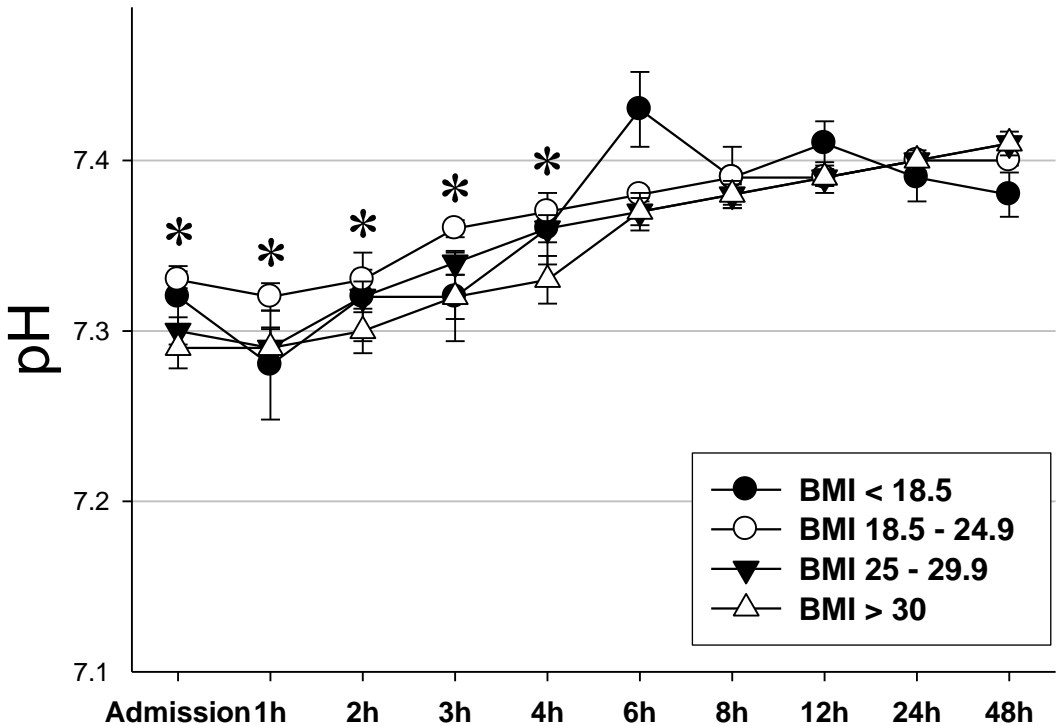

Supplement: MOESM5 [file 9708788]
